# Supplementary material
Source: PubMed Central journal article supplement (PMC2376235)
Supplement: jbc_M709397200_1.pdf [file jbc_M709397200_1.pdf]

## Supplementary Figure 1

1 GAAACACAATAGCAGCTCCCTCCAAG

ATG GCG GCG GCG ACG GCA GAC CCG GGA GCT GGG AAC CCG CAG GCT GGG GAC TCC TCC GGT  
 Met Ala Ala Ala Pro Ala Asp Pro Gly Ala Gly Asn Pro Gln Ala Gly Asp Ser Ser Gly  
 GGG GAC TCC GGG GGC GGG CTA CCG TCA CCT GGA GAG CAG GAA CTG AGT CGG CGC CTG CAG  
 Gly Asp Ser Gly Gly Gly Leu Pro Ser Pro Gly Glu Gln Glu Leu Ser Arg Arg Leu Gln  
 CGC TTG TAC CCT GCG GTT AAT CAG CAC GAG ACG CCG CTG CCG CGC TCC TGG AGC CCC AAG  
 Arg Leu Tyr Pro Ala Val Asn Gln His Glu Pro Pro Leu Pro Arg Ser Trp Ser Pro Lys  
 GAC AAG TAC AAC TAC ATC GGC CTC TCC CAG GGA AAC CTC CGT GTC CAT TAC AAA GGT CAT  
 Asp Lys Tyr Asn Tyr Ile Gly Leu Ser Gln Gly Asn Leu Arg Val His Tyr Lys Gly His  
 GGC AAA AAT CAC AAA GAT GCA GCC TCT GTA CGT GCC ACC CAC CCC ATC CCA GCA GCC TGT  
 Gly Lys Asn His Lys Asp Ala Ala Ser Val Arg Ala Pro His Pro Ile Pro Ala Ala Cys  
 GGT ATT TAC TAT TTT GAA GTA AAG ATT GTC AGC AAA GGA AGA GAT GGG TAC ATG GGA ATT  
 Gly Ile Tyr Tyr Phe Glu Val Lys Ile Val Ser Lys Gly Arg Asp Gly Tyr Met Gly Ile  
 GGA CTC TCA GCG CAA GGC GTT AAC ATG AAC AGA CTG CCT GGT TGG GAC AAG CAT TCC TAT  
 Gly Leu Ser Ala Gln Gly Val Asn Met Asn Arg Leu Pro Gly Trp Asp Lys His Ser Tyr  
 GGT TAC CAT GGC GAT GAT GGG CAT TCC TTC TGC TCC TCT GGG ACA GGC CAG CCT TAT GGT  
 Gly Tyr His Gly Asp Asp Gly His Ser Phe Cys Ser Ser Gly Pro Gly Gln Pro Tyr Gly  
 CCC ACA TTC ACC ACA GGG GAT GTG ATC GGC TGT TGT GTC AAC CTC ATC AAT GGC ACC TGC  
 Pro Pro Phe Pro Pro Gly Asp Val Ile Gly Cys Cys Val Asn Leu Ile Asn Gly Pro Cys  
 TTC TAC ACC AAG AAT GGC CAC AGC CTT GGT ATC GCC TTC ACA GAT CTC CCG GCC AAC CTC  
 Phe Tyr Pro Lys Asn Gly His Ser Leu Gly Ile Ala Phe Pro Asp Leu Pro Ala Asn Leu  
 TAC CCC ACT GTC GGC CTA CAG ACA CCT GGG GAG ATT GTG GAT GCC AAC TTT GGG CAG CAG  
 Tyr Pro Pro Val Gly Leu Gln Pro Pro Gly Glu Ile Val Asp Ala Asn Phe Gly Gln Gln  
 CCC TTC CTG TTC GAC ATT GAG GAC TAT ATG CCG GAG TGG CGT GCC AAA GTC CAG GGC ACT  
 Pro Phe Leu Phe Asp Ile Glu Asp Tyr Met Arg Glu Trp Arg Ala Lys Val Gln Gly Pro  
 GTG CAC GGC TTT CCC ATA AGT GCC CGG CTT GGC GAG TGG CAG GCG GTG CTG CAG AAC ATG  
 Val His Gly Phe Pro Ile Ser Ala Arg Leu Gly Glu Trp Gln Ala Val Leu Gln Asn Met  
 GTC TCG TCT TAC CTG GTG CAT CAT GGG TAT TGT TCC ACA GCC ACA GCT TTT GCC CGA ATG  
 Val Ser Ser Tyr Leu Val His His Gly Tyr Cys Ser Pro Ala Pro Ala Phe Ala Arg Met  
 ACT GAA ACC CCG ATT CAG GAA GAG CAG GCA TCC ATA AAG AAC AGA CAA AAA ATC CAG AAG  
 Pro Glu Pro Pro Ile Gln Glu Glu Gln Ala Ser Ile Lys Asn Arg Gln Lys Ile Gln Lys  
 CTG GTG CTG GAA GGC CGG GTG GGT GAA GCC ATT GAG ACA ACC CAG CGC TTC TAC CCT GGG  
 Leu Val Leu Glu Gly Arg Val Gly Glu Ala Ile Glu Pro Pro Gln Arg Phe Tyr Pro Gly  
 CTG CTG GAA CAT AAT CCC AAC CTG CTC TTC ATG CTC AAG TGT CGA CAG TTC GTG GAG ATG  
 Leu Leu Glu His Asn Pro Asn Leu Leu Phe Met Leu Lys Cys Arg Gln Phe Val Glu Met  
 GTG AAC GGC ACT GAC AGT GAG GTC CGC AGC CTG AGT TCC CGA AGC CCC AAG TCC CAG GAC  
 Val Asn Gly Pro Asp Ser Glu Val Arg Ser Leu Ser Ser Arg Ser Pro Lys Ser Gln Asp  
 AGC TAC CCT GGC TCC CCC AGC CTC AGC CCC CGA CAT GGC CCC AGT AGT TCC CAT ATA CAC  
 Ser Tyr Pro Gly Ser Pro Ser Leu Ser Pro Arg His Gly Pro Ser Ser Ser His Ile His  
 AAC ACA GGA GCA GAC AGT CCC AGC TGC AGC AAT GGC GTC GCA TCC ACC AAG AAC AAA CAG  
 Asn Pro Gly Ala Asp Ser Pro Ser Cys Ser Asn Gly Val Ala Ser Pro Lys Asn Lys Gln  
 AAC CAC AGT AAA TAC CCC GCA CCC AGC TCC TCC TCG TCC TCA TCC TCC TCG TCC TCC  
 Asn His Ser Lys Tyr Pro Ala Pro Ser  
 TCT TCC CCG TCC TCC GTC AAT TAC TCC GAG TCC AAC TCA ACA GAC TCT ACC AAG TCC CAG  
 Ser Ser Pro Ser Ser Val Asn Tyr Ser Glu Ser Asn Ser Pro Asp Ser Pro Lys Ser Gln  
 CCC CAC AGC AGT ACC AGT AAC CAG GAG ACC AGT GAT AGC GAG ATG GAG ATG GAG GCA GAG  
 Pro His Ser Ser Pro Ser Asn Gln Glu Pro Ser Asp Ser Glu Met Glu Met Glu Ala Glu  
 CAC TAT CCC AAT GGT GTG CTG GAA AGC GTC TCC ACG CGC ATC GTC AAT GGG GCC TAT AAG  
 His Tyr Pro Asn Gly Val Leu Glu Ser Val Ser Pro Arg Ile Val Asn Gly Ala Tyr Lys  
 CAT GAC GAC CTG CAG ACA GAT GAG TCC AGC ATG GAC GAC GGG CAT CCA CGG AGG CAG CTC  
 His Asp Asp Leu Gln Pro Asp Glu Ser Ser Met Asp Asp Gly His Pro Arg Arg Gln Leu  
 TGC GGG GGC AAC CAG GCT GCC ACA GAA AGG ATC ATC CTG TTT GGC CGA GAG CTG CAG GCA  
 Cys Gly Gly Asn Gln Ala Ala Pro Glu Arg Ile Ile Leu Phe Gly Arg Glu Leu Gln Ala  
 TTG AGC GAG CAG CTG GGC CGG GAG TAC GGC AAG AAC TTT GCC CAC ACG GAG ATG CTG CAG  
 Leu Ser Glu Gln Leu Gly Arg Glu Tyr Gly Lys Asn Leu Ala His Pro Glu Met Leu Gln  
 GAT GCC TTT AGC CTA CTA GCA TAC TCA GAC CCC TGG AGC TGC CCA GTA GGT CAT CAG CTT  
 Asp Ala Phe Ser Leu Leu Ala Tyr Ser Asp Pro Trp Ser Cys Pro Val Gly His Gln Leu  
 GAT CCC ATC CAG AGA GAG CCC GTG TGT GCT GCT CTC AAC AGC GCC ATT TTA GAG TCT CAG  
 Asp Pro Ile Gln Arg Glu Pro Val Cys Ala Ala Leu Asn Ser Ala Ile Leu Glu Ser Gln  
 AAC CTG CCA AAG CAG CCT CCT TTG ATG CTC GCC CTG GGC CAG GCA TCT GAA TGT CTA CGG  
 Asn Leu Pro Lys Gln Pro Pro Leu Met Leu Ala Leu Gly Gln Ala Ser Glu Cys Leu Arg  
 CTC ATG GCC CGA GCA GGC CTG GGA TCT TGC TCC TTT GCC AGA GTC GAT GAC TAC TTG CAC  
 Leu Met Ala Arg Ala Gly Leu Gly Ser Cys Ser Phe Ala Arg Val Asp Asp Tyr Leu His  
 TAG  
 \*\*\*

CAGACCTTCCTGGCTGGCTCTGGCTGGCCCTCCTTCAGCCCTAGGGCTGGAGCAGCCCTGTCTCCGTAGGCATCTGGTA  
CAGAGACCTGGAGCCATGGGCAGAGTTCACTCCTTCTACCTGGCCGGTCCATCCTCCTTTCTCCTTCCCTTCCTCCCT  
CCCTCCCTTGCTCTCCTCCTCCTGTCCCTTCCACGTGCAGCGACCTGTGACTCAGTATTTGGCTGGTTACTCATGTGGTA  
GCTTCTCCTTTAAAGGAGATTTGTTTTGAGGAGAGGTTGGTTTTTTTTTTGTTTTTGGATCTTGTGTTTTTTTTTTAACT  
TTTTTTTCCCTGACTGAGCCACCAGTGTATATCTCGGGAGAGTTTTGTGCTGAGCTGGTGTCTGTAACTTAGTAATGA  
AGCCTATCCAGGTTGATGATAGCTTATTTATTTTCATAAGTAAAAAACAACAATGAGATTATATATATATATATATAT  
AAATATATATATAAAAAAAGTCACAGTATTTATCTAGCACTAGTGGTCCAGCACCTCTTGGGTGAGGCTGTCCAGACA  
CCATGTGTTTTTATTGAGTCCAACTCATTTAAAAAGAATCATCTCTTTGTCACTTCAATCAAGTGATTTGTTTTATTTTAG  
GCTCCCTTTTGTGAGCCTCAGGTCAGCTGCTGCCAGGAAATATGGGTTTTGGGGAAGGCTGTTTTGGTGGGCAAGGT  
CAGACTAAGCTGTTTTGCAGCATCCCAAGAGGTGTGGGTCCTTAGGCCCCCTATAGGTAACAAAAGAAGTGCAGGTTCA  
GGGATTCAAGGAAAGTGGTGGCCAGGGGCACACAGCAAAGCAAGGGAACACAGGGTCCGTAGCCAGCATGCTGTCTAC  
CACTTACCTGCCTCTCACTGCCTGCCCTTGCCCTCTCTCCCATCTCAATGCCCTGCCTTCCCTTGTAAAGATGGCCAAA  
TAATTCATTACTCTCAGTTGATTCCTGGAACTACTGCCTTCATCCCAAGAGCTGCTGTGTGCCAGGCTGCCAAGAGG  
AAGCCATTCCCAAGACAGAGGCCCTTAAGGACAGGGCTCTTTTCTTCCGTGCCAGAGTCTTCAACATCACTGCCCAACCT  
GATGGGATTGATGCTTTCTGTGGAGAAGTTGGTACCTCATGGAGACTGATTTCTGGATCACTGGTCCAGAGTGGATGGA  
ACCTTTGACTTCCCTGATCCGGATTTCCCTACAGCTTAAGGAAGGCTGCTCCCTACAGCGTGGCCACGACTTGGGTA  
AGGGGGACTCCATGGGCTTACATATGTCCACCAGCTGTTTTACAGGATCCTCACAGCTGGCGGGACAACAGCAACAA  
CAAAACCCACTATCCCAGGGCTGAGATGCTGCCAGGACATGAGTAGGCCATCTGTGGAGGGGACTGTCTACCAAGGAAGA  
GGAGGGTCTATACAGAGGACACCTAGGAGGGCCAGGATTTTACCTGCTTCACAGGGTGAAGTGAAGGAAAGCTAGGCAA  
CCTCTGCAAAGATTAGGGTCAACTGTGGCAAAGCCACAAGTGAAGTTTCCAGTCTCCAAGTGCATCTGGGCAGGGGAAGCT  
TTTTGTTCTGCTGGTGGACACAGAAATCAATGGCAGAGCTCGAGATGTTCTGTGCCACCAGTCTCACAAGGGCCACAG  
TGGACAAAATTGAATTAGACCACTGTCTCAGTGAAGGAAGTAGGGCCTTACTGAGATCCTCCAAAATTTTGTCTTAGGGTC  
TAATCCTACAGGCTACTATGTTTTCTGGTTCCTGTCCAGGGCCTTAGTTTACAGCTCCTCAGGAGGCTTGTCTCTATGTA  
AAGGAAATTTTCACTCTGTCCAAGGCTGGGACACCAAGCTCCAAGCTCAGGTTGGAATATCAGGCTGTTAACAATGGAT  
GGGCTTACATTTGGAATGAAAACAGAGGCATTTGCAGAGCAGTGAAGTGAAGAACTCTCCACCAGTCTCTCCT  
TTTACAGTGAAAGAAACAGGTCAGGAAATTAAGTGATTTGACCAAAGCCACACAGCAAATAGTGGCAGAACCAGGACTA  
ACTACTCCTGTGGGTTAGACAAGTCTCTGTGCTGACCTAAAGCAAATGGCAAATGAGCTTTGTAAGGGGTTAGGTTGGCG  
TGAGTTCAGCAGTGCCTGAGCAGCTGGCACCTTTCTGTTGTGACGGGTAGGGATGGGTGCTGAGACGTGGATTGCGGAG  
TGGCTGAGAGGGCCTTGGACGGCTTGGGACTGCTGTGTGCTGCACGGGATTGTATGTCCACCTGGCTCACACTCAGTACC  
CATGGCCACCTCCCAATTAATCTGTGCCTTATCTCACTGTTTTAGCTGAGTCCAAGTGTTTACTCTGTCTCTCTCCA  
GAGAGGCTTTCTGTCTAGTTGGACAGCTCACTTTGGGGACATAAGCTTTTGTTCACAAGCTGTGGGGAGGGCCAAAAT  
CAAGCTGCTGGAGCCAGTAATTAGTCCAGTCTGCTGCCAGAGGAGACCTGTATGCACCCCAATTCACACTAGCCATTT  
CCAGGAATCTGGAGTGGAGGACAGTTCCTGGAAGCAACTTAGCAAAGAGCTGGACCTGACCTGGTGTGCAAAAAGGAGGA  
CCTGGCCGGGTTGGGTTTGTCCAGTCTTGAAGTAGCAGCAATTTCCCTAGCTCACTTTCCCTAGGAGGCACAGATGGCAGCT  
CCTTGCAGAGCAAGGGCAAGTTGGCGGATGACTCAGAGTCCCTCTCCCCAATCCCTTCTCTGAGGGTCTGTGGCTAG  
GTGCAGACTGGGTGCAGAACATCAAACTAAAGAAGTAAAGGACTGCCTGGCTACCCAGCACCTTCCAGTCTTAAAGCA  
CAAAGATGAGGCAGAGGACTGTTGGGGCTGAACGTTCCCTTTGGTTGCTCACAACCTCAGGTATGCATGTCATTGGCAGCT  
GGACAGCAAAGCCCTACTTCAACCAATCACAGGCATTTGGACCTGTGGCCAGATGGTGGCTTCTGGCTGTCCAGTGC  
CCACCTCTTGCATCGGTTCCCTCCATTAACAACCTACAGCTGAACTGGCATCCTCCACAGTGTGCACACTGGCTCTGCC  
TTTTGCTTGCAGTTGATATTCGGCATTAGCATGAACTTTGGTGTGAGAGGTTGACAGAATTCACACAACAATC  
CTAGTAAATTTGACTTGGAGATGAAAAGATTCTGTTGTATTTTGCAGAAATTTTATTTAAATACACATCCATGAGC  
AAAAAAAAAAAAAAAA 5185

**Supplementary Figure 1.** *Nucleotide and amino acid sequence of mouse RanBP10.* All 3 clones identified in the yeast two-hybrid screen began with the underlined nucleotides (number 49 in this schema) and spanned about 1.2 kb. The presumptive transcription start site (position 1) in MKs was determined by 5' rapid amplification of cloned ends (RACE) and differed from the Genbank entry NM\_145824. Numbering corresponds to the sequence entered in GenBank as EU281316. The target sequences for 2 independent short hairpin (sh) RNAs, #1982 and #4971, are marked in red.
