# Supplementary material
Source: PubMed Central journal article supplement (PMC2376235)
Supplement: jbc_M709397200_2.pdf [file jbc_M709397200_2.pdf]

## Supplementary Figure 2

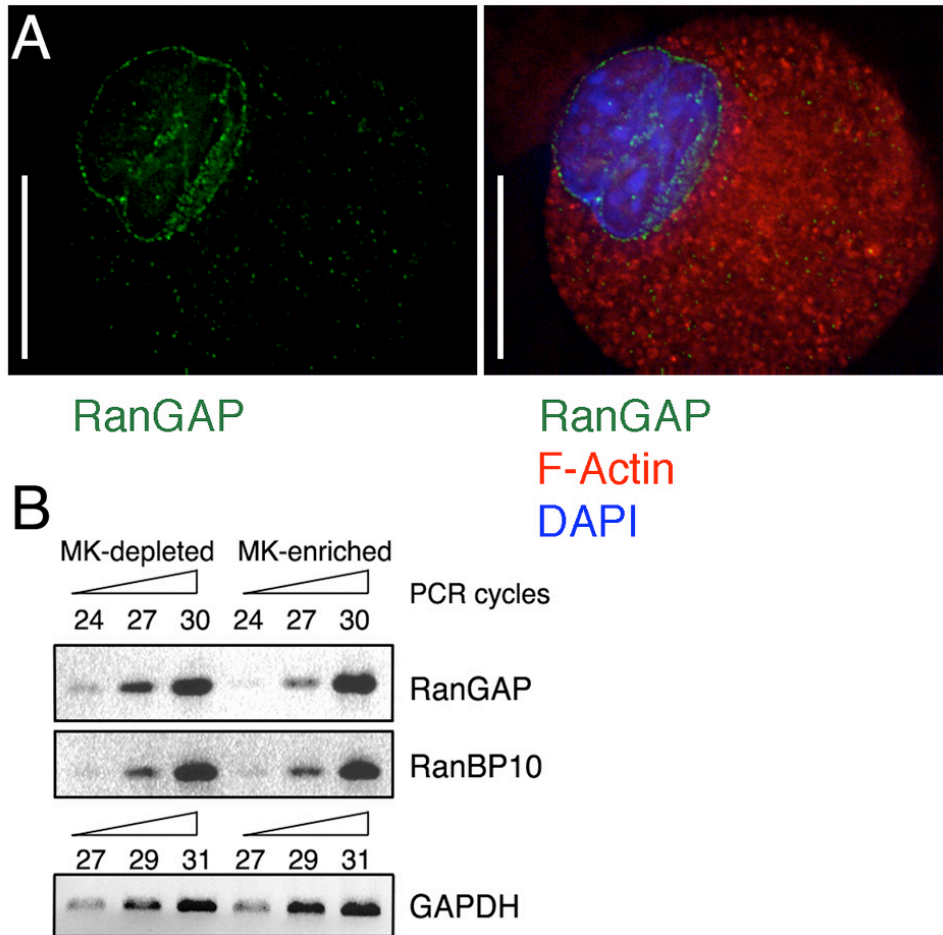

**Supplementary Figure 2.** *Ran-GAP and RanBP10 in mature megakaryocytes.* (A) Ran-GAP (green stain) concentrates at the nuclear envelope in MKs, as expected and as revealed by IF. Cells were counterstained with Alexa594-conjugated phalloidin (red) and DAPI (blue) to highlight the cytoplasm and nucleus, respectively. Scale bars: 15  $\mu$ m. (B) Semi-quantitative RT-PCR using cDNA from hematopoietic cell cultures either depleted (left) or enriched (right) for mature MKs, with PCR cycle numbers as indicated for Ran-GAP1, RanBP10 and GAPDH. Ran-GAP mRNA levels are reduced in the MK-enriched population, whereas RanBP10 levels are slightly increased, both in comparison with GAPDH.
